# Supplementary material for: Geographic Variation and Disparity in Stimulant Treatment of Adults and Children in the United States in 2008
Source: Atypon-hosted journal article supplement (doi:10.1176/appi.ps.004442012), 2013-08-02
Supplement: 1079_ds001.pdf [file 1079_ds001.pdf]

## Online Supplement to Table 2 in text

## Coefficients and standard errors for state variables included but not shown in model 3

| State (reference: Alabama) | Coefficient | SE   |
|----------------------------|-------------|------|
| Alaska                     | .230        | .44  |
| Arizona                    | -.590       | .44  |
| Arkansas                   | .482        | .27  |
| California                 | -1.085***   | .33  |
| Colorado                   | -.544       | .29  |
| Connecticut                | -.916       | .59  |
| Delaware                   | 1.727*      | .87  |
| DC                         | 1.103***    | .29  |
| Florida                    | 1.309***    | .25  |
| Georgia                    | -.824       | 1.58 |
| Hawaii                     | -.529       | .31  |
| Idaho                      | .555*       | .26  |
| Illinois                   | .911***     | .25  |
| Indiana                    | 1.096***    | .24  |
| Iowa                       | -.093       | .26  |
| Kansas                     | .666**      | .24  |
| Kentucky                   | .444        | .30  |
| Louisiana                  | -.491       | .43  |
| Maine                      | 1.087**     | .36  |
| Maryland                   | -.521       | .44  |
| Massachusetts              | -.050       | .28  |
| Michigan                   | .036        | .25  |
| Minnesota                  | -.271       | .25  |
| Mississippi                | .381        | .24  |
| Montana                    | .243        | .30  |
| Nebraska                   | .049        | .30  |
| Nevada                     | -.471       | .43  |
| New Hampshire              | -.133       | .50  |
| New Jersey                 | -.538       | .39  |
| New Mexico                 | -.232       | .37  |
| New York                   | -.350       | .38  |
| North Carolina             | 1.021***    | .23  |
| North Dakota               | .398        | .30  |
| Ohio                       | .710**      | .26  |
| Oklahoma                   | -.206       | .27  |
| Oregon                     | -.377       | .33  |
| Pennsylvania               | .098        | .30  |
| Rhode Islands              | -1.260      | .69  |
| South Carolina             | .436        | .29  |
| South Dakota               | .380        | .27  |
| Tennessee                  | -.046       | .25  |
| Texas                      | .223        | .24  |
| Utah                       | -1.632***   | .35  |
| Vermont                    | -1.324**    | .50  |
| Virginia                   | .140        | .24  |
| Washington                 | -.563       | .30  |
| West Virginia              | .844**      | .28  |
| Wyoming                    | .230        | .44  |

\*p&lt;.05, \*\*p&lt;.01, \*\*\*p&lt;.001

Online Supplement to Table 3 in text

Coefficients and standard errors for state variables included but not shown in model 3

| State (reference: Alabama) | Coefficient | SE  |
|----------------------------|-------------|-----|
| Alaska                     | -.352***    | .08 |
| Arizona                    | -.252**     | .08 |
| Arkansas                   | -.210***    | .05 |
| California                 | -.402***    | .06 |
| Colorado                   | -.343***    | .05 |
| Connecticut                | -.197       | .11 |
| Delaware                   | .020        | .16 |
| DC                         | -.251***    | .05 |
| Florida                    | -.096*      | .05 |
| Georgia                    | -.955**     | .29 |
| Hawaii                     | -.097       | .06 |
| Idaho                      | -.285***    | .05 |
| Illinois                   | -.163***    | .05 |
| Indiana                    | -.197***    | .05 |
| Iowa                       | -.253***    | .05 |
| Kansas                     | -.126**     | .04 |
| Kentucky                   | .075        | .06 |
| Louisiana                  | -.014       | .08 |
| Maine                      | -.237***    | .07 |
| Maryland                   | .272**      | .08 |
| Massachusetts              | -.054       | .05 |
| Michigan                   | -.085       | .05 |
| Minnesota                  | -.064       | .05 |
| Mississippi                | -.150***    | .05 |
| Montana                    | -.082       | .06 |
| Nebraska                   | -.321***    | .06 |
| Nevada                     | -.394***    | .08 |
| New Hampshire              | .100        | .09 |
| New Jersey                 | -.201**     | .07 |
| New Mexico                 | -.306***    | .07 |
| New York                   | -.404***    | .07 |
| North Carolina             | -.255***    | .04 |
| North Dakota               | -.251***    | .06 |
| Ohio                       | -.235***    | .05 |
| Oklahoma                   | -.329***    | .05 |
| Oregon                     | -.200**     | .06 |
| Pennsylvania               | -.265***    | .06 |
| Rhode Islands              | .185        | .13 |
| South Carolina             | -.087       | .06 |
| South Dakota               | -.259***    | .05 |
| Tennessee                  | .018        | .05 |
| Texas                      | -.262***    | .04 |
| Utah                       | .008        | .07 |
| Vermont                    | -.098       | .09 |
| Virginia                   | -.187***    | .05 |
| Washington                 | -.179**     | .06 |
| West Virginia              | -.241***    | .05 |
| Wyoming                    | -.230***    | .07 |

\*p&lt;.05, \*\*p&lt;.01, \*\*\*p&lt;.001
